# Supplementary material for: Behavioral Changes, Adaptation, and Supports among Indonesian Female Sex Workers Facing Dual Risk of COVID-19 and HIV in a Pandemic
Source: MDPI journal article supplement (doi:10.3390/ijerph19031361), 2022-01-26
Supplement: s1 [file s1]

**Table S1.** Distribution and factor loading of sex work-related COVID-19 preventive behavior score.

| Items                                   | Distribution, n (%) |            |            |            | Loading Factor |              | Internal Reliability |                 |
|-----------------------------------------|---------------------|------------|------------|------------|----------------|--------------|----------------------|-----------------|
|                                         | Never               | Sometime   | Often      | Always     | Component I    | Component II | Cronbach $\alpha$    | If item deleted |
| Prepare sanitation equipment before sex | 46 (4.8)            | 120 (12.9) | 324 (34.1) | 461 (48.5) | <b>0.786</b>   | 0.193        | 0.915                | 0.905           |
| Hand washing before sex                 | 50 (5.3)            | 134 (14.1) | 359 (37.7) | 408 (42.9) | <b>0.804</b>   | 0.208        |                      | 0.901           |
| Check client's temperature              | 87 (9.1)            | 144 (15.1) | 311 (32.7) | 409 (43.0) | <b>0.822</b>   | 0.199        |                      | 0.896           |
| Check client for any symptoms           | 109 (11.5)          | 135 (14.2) | 302 (31.8) | 405 (42.6) | <b>0.811</b>   | 0.175        |                      | 0.901           |
| Mandatory shower before sex             | 52 (5.5)            | 120 (12.6) | 315 (33.1) | 464 (48.8) | <b>0.857</b>   | 0.151        |                      | 0.895           |
| Mandatory shower after sex              | 41 (4.3)            | 95 (10.0)  | 323 (34.0) | 492 (51.7) | <b>0.835</b>   | 0.150        | 0.842                | 0.899           |
| Wear face mask during sex               | 206 (21.7)          | 200 (21.0) | 214 (22.5) | 331 (34.8) | 0.385          | <b>0.720</b> |                      | 0.865           |
| Wear face-shield during sex             | 383 (40.3)          | 267 (28.1) | 125 (13.1) | 176 (18.5) | 0.154          | <b>0.910</b> |                      | 0.708           |
| Wear gloves during sex                  | 464 (48.8)          | 247 (26.0) | 107 (11.3) | 133 (14.0) | -              | <b>0.903</b> |                      | 0.760           |
| <b>Eigen value</b>                      |                     |            |            |            | 4.952          | 1.617        |                      |                 |
| <b>Variance explained (%)</b>           |                     |            |            |            | 55.03          | 17.97        |                      |                 |
| <b>Cumulative (%)</b>                   |                     |            |            |            | 55.03          | 73.00        |                      |                 |

**Table S2.** Multivariate analysis for types of online sex work as determinants of major income reduction and reduced condom use.

| Variables (n = 951)                                             | Major Income Reduction |           | Reduced Condom Use   |           |
|-----------------------------------------------------------------|------------------------|-----------|----------------------|-----------|
|                                                                 | aOR (95% CI)           | P         | aOR (95% CI)         | P         |
| <b>Location, n (%)</b>                                          |                        |           |                      |           |
| Bandung (n = 250)                                               | Ref.                   |           | Ref.                 |           |
| Greater Jakarta (n = 334)                                       | 1.08 (0.73 – 1.61)     | 0.004**   | 0.64 (0.37 – 1.11)   | 0.054     |
| Yogyakarta (n = 152)                                            | 2.81 (1.56 – 5.06)     |           | 0.32 (0.14 – 0.75)   |           |
| Bali (n = 215)                                                  | 1.29 (0.83 – 2.02)     |           | 0.58 (0.30 – 1.11)   |           |
| Age (years)                                                     | 1.02 (0.99 – 1.05)     | 0.176     | 1.00 (0.96 – 1.04)   | 0.988     |
| <b>Education</b>                                                |                        |           |                      |           |
| Not completed high school (n = 430)                             | -                      | -         | -                    | -         |
| High school (n = 480)                                           |                        |           |                      |           |
| College degree (n = 41)                                         |                        |           |                      |           |
| <b>Employment other than sex work</b>                           |                        |           |                      |           |
| None (n = 606)                                                  | Ref.                   | 0.006**   | -                    | -         |
| Employed (n = 345)                                              | 0.62 (0.45 – 0.88)     |           |                      |           |
| <b>Marital status, n (%)</b>                                    |                        |           |                      |           |
| Single (n = 388)                                                | Ref.                   |           | Ref.                 |           |
| Cohabitation (n = 49)                                           | 1.78 (0.84 – 3.79)     | 0.392     | 0.83 (0.32 – 2.15)   | 0.056     |
| Married (n = 148)                                               | 0.86 (0.53 – 1.42)     |           | 0.76 (0.40 – 1.46)   |           |
| Widowed/divorced (n = 366)                                      | 1.00 (0.67 – 1.47)     |           | 0.43 (0.23 – 0.79)   |           |
| <b>Housing</b>                                                  |                        |           |                      |           |
| Alone (n = 355)                                                 | -                      | -         | -                    | -         |
| With roommate (n = 200)                                         |                        |           |                      |           |
| With family (n = 396)                                           |                        |           |                      |           |
| <b>HIV status</b>                                               |                        |           |                      |           |
| Negative (n = 488)                                              | Ref.                   | < 0.001** | Ref.                 | 0.035*    |
| Unknown (n = 376)                                               | 0.58 (0.42 – 0.82)     |           | 1.62 (1.00 – 2.62)   |           |
| Positive (n = 87)                                               | 0.20 (0.12 – 0.34)     |           | 2.44 (1.11 – 5.38)   |           |
| <b>Fear of COVID-19 score</b>                                   |                        |           |                      |           |
| Low (n = 493)                                                   | Ref.                   | < 0.001** | -                    | -         |
| High (n = 458)                                                  | 1.87 (1.36 – 2.57)     |           |                      |           |
| <b>Engaged in video Call Sex</b>                                |                        |           |                      |           |
| No (n = 707)                                                    | Ref.                   | 0.042*    | Ref.                 | 0.803     |
| Yes (n = 244)                                                   | 0.69 (0.48 – 0.99)     |           | 1.06 (0.65 – 1.74)   |           |
| <b>Engaged in phone Call Sex</b>                                |                        |           |                      |           |
| No (n = 841)                                                    | -                      | -         | Ref.                 | 0.038*    |
| Yes (n = 110)                                                   |                        |           | 1.89 (1.04 – 3.46)   |           |
| <b>Engaged in chat Sex/Sexting</b>                              |                        |           |                      |           |
| No (n = 882)                                                    | Ref.                   | 0.663     | -                    | -         |
| Yes (n = 69)                                                    | 0.88 (0.49 – 1.58)     |           |                      |           |
| <b>Sanitation &amp; personal hygiene during sex work, n (%)</b> |                        |           |                      |           |
| Low adherence (n = 477)                                         | Ref.                   | 0.047*    | Ref.                 | 0.001**   |
| High adherence (n = 474)                                        | 1.39 (1.00 – 1.92)     |           | 0.40 (0.24 – 0.65)   |           |
| <b>PPE use during sex work, n (%)</b>                           |                        |           |                      |           |
| Low adherence (n = 366)                                         | -                      | -         | Ref.                 | 0.499     |
| High adherence (n = 585)                                        |                        |           | 1.19 (0.72 – 1.96)   |           |
| <b>Client frequency changes</b>                                 |                        |           |                      |           |
| Little to no effect (n = 306)                                   | Ref.                   | < 0.001** | -                    | -         |
| Major reduction (n = 645)                                       | 3.30 (2.40 – 4.54)     |           |                      |           |
| <b>Changes to condom access</b>                                 |                        |           |                      |           |
| No change or easier (n = 792)                                   | N/A                    | N/A       | Ref.                 | < 0.001** |
| More difficult (n = 159)                                        |                        |           | 10.76 (6.71 – 17.76) |           |
